# Supplementary material for: Genome-wide survey of the HMA gene family in wheat (Triticum aestivum) and its potential role in cadmium stress
Source: Research Square preprint supplement (doi:10.21203/rs.3.rs-5264727/v1), 2025-04-11
Supplement: Supplementary file 1 [file 1fae678349a60d7f7a0df8e6.xlsx]

## Sheet: Sheet1
Table S3. Ka/Ks ratios and estimated divergence time for duplicated TaHMA gene pairs
Location on wheat genome								Ka	Ks	Ka/Ks	Mya
Gene Name	Chr.	Start	End	Gene Name	Chr.	Start	End
TaHMA001	2A	668067544	668073388	TaHMA002	2B	616494297	616500111	0.00941154	0.124793	0.0754172	9.59947
TaHMA001	2A	668067544	668073388	TaHMA003	2D	522990194	523000156	0.0203251	0.102468	0.198355	7.88217
TaHMA002	2B	616494297	616500111	TaHMA003	2D	522990194	523000156	0.0189934	0.101839	0.186505	7.83374
TaHMA004	4A	6020338	6033023	TraesCS4B02G293600	4B	579391172	579398644	0.00726398	0.0878063	0.0827273	6.75433
TaHMA004	4A	6020338	6033023	TaHMA005	4D	463402923	463409941	0.0146899	0.105583	0.139132	8.12174
TaHMA006	5A	581137113	581140512	TaHMA007	5B	567018067	567021814	0.021961	0.0782468	0.280664	6.01898
TaHMA006	5A	581137113	581140512	TaHMA008	5D	460941086	460944519	0.0234163	0.0788596	0.296936	6.06613
TaHMA007	5B	567018067	567021814	TaHMA008	5D	460941086	460944519	0.0250615	0.109928	0.227982	8.45596
TaHMA009	6A	146000586	146005878	TaHMA011	6B	207923884	207929181	0.00777327	0.0862763	0.0900975	6.63664
TaHMA010	6A	150964243	150970363	TaHMA012	6B	226399885	226404875	0.00408689	0.0875716	0.0466692	6.73627
TaHMA009	6A	146000586	146005878	TaHMA013	6D	117414359	117419743	0.00622733	0.0463957	0.134222	3.5689
TaHMA010	6A	150964243	150970363	TaHMA014	6D	127382802	127388058	0.0022674	0.0373551	0.0606986	2.87347
TaHMA009	6A	146000586	146005878	TaHMA019	7A	672069735	672075854	0.096614	0.818165	0.118086	62.9358
TaHMA009	6A	146000586	146005878	TaHMA023	7B	648103932	648109965	0.0948314	0.832052	0.113973	64.004
TaHMA009	6A	146000586	146005878	TaHMA028	7D	580570228	580576400	0.0977172	0.821228	0.118989	63.1714
TaHMA012	6B	226399885	226404875	TaHMA014	6D	127382802	127388058	0.00451707	0.0806243	0.0560261	6.20187
TaHMA011	6B	207923884	207929181	TaHMA019	7A	672069735	672075854	0.0976042	0.772051	0.126422	59.3885
TaHMA011	6B	207923884	207929181	TaHMA023	7B	648103932	648109965	0.0978914	0.776856	0.12601	59.7582
TaHMA011	6B	207923884	207929181	TaHMA028	7D	580570228	580576400	0.0980545	0.76994	0.127353	59.2262
TaHMA013	6D	117414359	117419743	TaHMA019	7A	672069735	672075854	0.094398	0.810774	0.116429	62.3673
TaHMA013	6D	117414359	117419743	TaHMA023	7B	648103932	648109965	0.094676	0.80761	0.11723	62.1239
TaHMA013	6D	117414359	117419743	TaHMA028	7D	580570228	580576400	0.0976709	0.801113	0.121919	61.6241
TaHMA016	7A	611316717	611334498	TaHMA021	7B	570450770	570459961	0.0121351	0.113335	0.107073	8.71808
TaHMA018	7A	634378971	634387635	TraesCS7B02G337700	7B	592505525	592511328	0.0185596	0.0535214	0.346769	4.11703
TaHMA019	7A	672069735	672075854	TaHMA023	7B	648103932	648109965	0.00784331	0.108042	0.0725951	8.31091
TaHMA015	7A	214311509	214322302	TaHMA020	7B	165301384	165310703	0.0060415	0.0498182	0.121271	3.83217
TaHMA015	7A	214311509	214322302	TaHMA024	7D	201883715	201893169	0.00604178	0.0498108	0.121294	3.8316
TaHMA016	7A	611316717	611334498	TaHMA025	7D	530907556	530915075	0.0112418	0.100736	0.111596	7.74892
TaHMA018	7A	634378971	634387635	TaHMA027	7D	548885379	548894155	0.00704326	0.065634	0.107311	5.04877
TaHMA019	7A	672069735	672075854	TaHMA028	7D	580570228	580576400	0.0102254	0.0890571	0.114819	6.85055
TaHMA021	7B	570450770	570459961	TaHMA025	7D	530907556	530915075	0.0163862	0.112004	0.1463	8.61571
TaHMA023	7B	648103932	648109965	TaHMA028	7D	580570228	580576400	0.0077695	0.109841	0.0707339	8.44933
TaHMA020	7B	165301384	165310703	TaHMA024	7D	201883715	201893169	0.00608167	0.0420146	0.144751	3.23189
TraesCS4B02G293600	4B	579391172	579398644	TaHMA005	4D	463402923	463409941	0.00817447	0.0679197	0.120355	5.22459
TraesCS7B02G337700	7B	592505525	592511328	TaHMA027	7D	548885379	548894155	0.019719	0.0501889	0.392896	3.86068
