# Supplementary material for: Genome-wide survey of the HMA gene family in wheat (Triticum aestivum) and its potential role in cadmium stress
Source: Research Square preprint supplement (doi:10.21203/rs.3.rs-5264727/v1), 2025-04-11
Supplement: Supplementary file 2 [file 3437d9ef281908a8d9ebb6f6.xlsx]

## Sheet: Sheet1
Table S2. Primers used for qRT-PCR
Gene Name	forward primer (5'-3')	reverse primer (5'-3')
qPCR-HMA1	CAGAATTGTCCAGCTGACTGAAGAG	AGTAGTGCAACAGCCAAAGACAGAG
qPCR-HMA2	AACAAGGAGTTGGTCGGGCTATTC	CTAGAACATTTCCCAGCTGGTTCTG
qPCR-HMA3	TGACGCTGGACATCAACATCCTC	GATCATGCTCATCAACGACGACATC
qPCR-HMA4	TTTCAGTTCCTGTGTTCCTGTTCG	GAGAACATAGCAACCACCGCAGTAG
qPCR-HMA5	CTTGGCAAAAGGAAAGACCTCTGAG	ATGCTTTCATTCACATGGCTCTGG
qPCR-HMA6	CTCTTGTTGAGACTGCCCAGATGT	GAGAACATGAGGGAGAAAACAAAGC
qPCR-HMA7	TCACAATTTGTACCTGCTGCTATCC	CGTAAAAGAAGTCCTCTCGTTGCAC
qPCR-HMA8	GTCCGTGTGCACTTGGATTAGCTAC	TCCAGAACAATTGCATCTATCCCAG
qPCR-HMA9	TTCCTTCTGATGGTGTTGTTGTTTG	TTCGTTGCTTGTATATGAAGGATGC
