# Supplementary material for: Genome-wide survey of the HMA gene family in wheat (Triticum aestivum) and its potential role in cadmium stress
Source: Research Square preprint supplement (doi:10.21203/rs.3.rs-5264727/v1), 2025-04-11
Supplement: Supplementary file 3 [file 485d9340bac16dbbf30c8a8b.xlsx]

## Sheet: Sheet2
	Table S1. Characteristic features of the HMA gene family identified in wheat
Gene ID	Gene name		Subcell location	protein			Physical position
				Length(aa)	PI	Molecular weight(Da)	Chrom no	Start position (bp)	End position (bp)
TraesCS2A02G410400.3	TaHMA001	InnerMembrane	PlasmaMembrane/Chloroplast	1011	5.66	109106	TaChr2A	668067544	668073388
TraesCS2B02G429200.2	TaHMA002	InnerMembrane	PlasmaMembrane/Chloroplast	994	5.88	107491	TaChr2B	616494297	616500111
TraesCS2D02G407800.5	TaHMA003	InnerMembrane/ Cytoplasmic	PlasmaMembrane/Chloroplast/Cytoplasmic	1000	5.65	108175	TaChr2D	522990194	523000156
TraesCS4A02G010800.1	TaHMA004	OuterMembrane/Cytoplasmic	Chloroplast/PlasmaMembrane	890	5.86	93266.2	TaChr4A	6020338	6033023
TraesCS4D02G292300.2	TaHMA005	Cytoplasmic/InnerMembrane	Chloroplast/PlasmaMembrane	889	6	92774.4	TaChr4D	463402923	463409941
TraesCS5A02G383400.1	TaHMA006	InnerMembrane	PlasmaMembrane	816	6.29	85658.4	TaChr5A	581137113	581140512
TraesCS5B02G388000.1	TaHMA007	InnerMembrane/ Cytoplasmic	PlasmaMembrane	829	6.05	86816.7	TaChr5B	567018067	567021814
TraesCS5D02G392700.1	TaHMA008	InnerMembrane	PlasmaMembrane	853	6.12	89091.2	TaChr5D	460941086	460944519
TraesCS6A02G156900.1	TaHMA009	InnerMembrane	PlasmaMembrane	997	5.23	106854	TaChr6A	146000586	146005878
TraesCS6A02G158900.1	TaHMA010	InnerMembrane/ Cytoplasmic	Cytoplasmic/PlasmaMembrane	974	5.44	105106	TaChr6A	150964243	150970363
TraesCS6B02G184800.1	TaHMA011	InnerMembrane	PlasmaMembrane	972	5.53	104694	TaChr6B	207923884	207929181
TraesCS6B02G192400.1	TaHMA012	InnerMembrane/ Cytoplasmic	PlasmaMembrane/Cytoplasmic	980	5.44	105627	TaChr6B	226399885	226404875
TraesCS6D02G146500.1	TaHMA013	InnerMembrane	PlasmaMembrane	998	5.39	107150	TaChr6D	117414359	117419743
TraesCS6D02G153600.1	TaHMA014	InnerMembrane/ Cytoplasmic	PlasmaMembrane/Cytoplasmic	994	5.44	107410	TaChr6D	127382802	127388058
TraesCS7A02G239700.1	TaHMA015	InnerMembrane	Chloroplast/PlasmaMembrane	803	6.28	85188.1	TaChr7A	214311509	214322302
TraesCS7A02G419500.1	TaHMA016	Cytoplasmic	PlasmaMembrane/Extracellular	985	6.29	106456	TaChr7A	611316717	611334498
TraesCS7A02G420000.1	TaHMA017	Cytoplasmic	PlasmaMembrane	939	7.11	99548.7	TaChr7A	611494813	611501344
TraesCS7A02G439100.1	TaHMA018	Cytoplasmic	PlasmaMembrane/Mitochondrial	828	6.81	88130.7	TaChr7A	634378971	634387635
TraesCS7A02G480100.1	TaHMA019	InnerMembrane	PlasmaMembrane	1001	5.29	106890	TaChr7A	672069735	672075854
TraesCS7B02G135300.1	TaHMA020	InnerMembrane/ Cytoplasmic	Chloroplast	952	7.23	100020	TaChr7B	165301384	165310703
TraesCS7B02G320100.2	TaHMA021	Cytoplasmic	PlasmaMembrane/Extracellular	1023	6.51	110320	TaChr7B	570450770	570459961
TraesCS7B02G320900.1	TaHMA022	InnerMembrane	PlasmaMembrane	766	7.83	81092.9	TaChr7B	571574749	571580218
TraesCS7B02G382300.1	TaHMA023	InnerMembrane	PlasmaMembrane	1001	5.28	106766	TaChr7B	648103932	648109965
TraesCS7D02G237500.1	TaHMA024	InnerMembrane/OuterMembrane	Chloroplast	952	6.98	99937.8	TaChr7D	201883715	201893169
TraesCS7D02G412400.1	TaHMA025	Cytoplasmic	PlasmaMembrane	1003	6.53	108329	TaChr7D	530907556	530915075
TraesCS7D02G412800.1	TaHMA026	Cytoplasmic	PlasmaMembrane	945	6.81	99995	TaChr7D	531082806	531089296
TraesCS7D02G428700.1	TaHMA027	Cytoplasmic	PlasmaMembrane/Mitochondrial	826	6.99	87769.3	TaChr7D	548885379	548894155
TraesCS7D02G467100.1	TaHMA028	InnerMembrane	PlasmaMembrane	1001	5.4	106780	TaChr7D	580570228	580576400

## Sheet: Sheet1
	TraesCS2A02G410400.3				>TaHMA001	MAAGALFLACFRGGGGGGGEGSGGRLALRPRYAPVPRRTKAAAVAGDLEAAAGAAEEEEEEKVVLFAVTGMTCAACAGSVEKAVKRLPGIHDAAVDVLGCRAQVAFYPAFVSEEKIRETIEDVGFGAKLIDEELKEKSILVCRLHIKGMTCTSCANTVESALQAVPGVQRASVALAIEEAEIRYNRRVVAAIQLVNAVEESGFEAILVTAGEDRSRIDLKVDGILNERSVMIVKSSVQALPGVEDIKIDTELQKITISYKPDQTGPRDLIEVIESAGSGHIAVSIYPEADGREQHRNGEITRYRQSFLWSLLFTIPVFLTSMVFMYIPGLKEGLDKKVVNMMSIGELLRWILSTPVQFVIGRKFYTGSYKAMCHGSPNMDVLIALGTNTAYFYSVYSVL…
	TraesCS2B02G429200.2				>TaHMA002	MAAGTRALFLACFRGGGGGGAEGSGHRLALRPRYAPVPRRTKAAAVAGDLEAAAGAAEEEEEKVAVFQVTGMTCAACAGSVEKAVKRLPGIHDAAVDVLGCRAQVAFYPAFVSEEKIRETIEDVGFGAKLIDEELKEKSILVCRLHIKGMTCTSCANTVESALQAVPGVQRASVALAIEEAEIRYNRRVVAAIQLVNAVEESGFEAILVTAGEDRSRIDLKVDGILNERSVMIVKSSVQALPGVEDIKIYTELQKITISYKPDQTGPRDLIEVIESAGSGHIAVSIYPEADGREQHRNGEITRYRQSFLWSLLFTIPVFLTSMVFMYIPGLKDGLDKKVVNMMSIGELLRWILSTPVQFVIGRKFYTGAYKAMCHGSPNMDVLIALGTNTAYFYSVYSV…
	TraesCS2D02G407800.5				>TaHMA003	MAAATRSLFLTCFHSSGSDESGHLTLRPRYPSMPRQPRAAAVAGEGGGGEGGSAAVDLEAAEEEEEEEKVAVFAVSGMTCAACAGSVEKAVKRLPGIHEAAVDVLGGRVQVAFYTALVSEEKIRETIEDVGFGAKLIDEELKEKSILVCRLHIKGMTCTSCANTVESALQAVPGVQRASVALAIEEAEIRYNRRVVAAIQLVNAVEESGFEAILVTAGEDRSRIDLKVDGILNERSAMIVKSSVQALPGVEDIKIDTELQKITISYKPDQTGPRDLIEVIESAGSGHIAVSIYPEADGREQHRNGEITRYRQSFLWSLLFTIPVFLTSMVFMYIPGLKEGLDKKVVNMMSIGELLRWILSTPVQFVIGRKFYTGAYKAMCHGSPNMDVLIALGTNTAYF…
	TraesCS4A02G010800.1				>TaHMA004	LHVRSPAQRTXXLFARRLRLPRSRRSAPSSQQRLRLIPRELPAGTPRAAADPSASTAVDVAPAAEEGAGATVLLDVSGMMCGGCAARVRSILAADARVESAAVNLLAESAAVRLRSPAPGAGEELAERLTACGFPSAERRGGATAGAAESALKWREMAARKSELLTRSRGRVAFAWTLVALCCGSHASHLLHSIGIHIGHGTFLDVLHNSYVKCGIAVVALFGPGRDILFDGLRAFKQGSPNMNSLVGFGSAAAFAISAVSLLNPELAWNSTFFDEPVMLLGFVLLGRSLEESARLKASSDMNELISLLSPQSRLVVTSSSDDLPSDGILNSDAITVEVPVNDVRVGDSVLVLPGETIPVDGNVTGGSSFVDESMLTGESLPVAKEKGCPVFSGTVNWD…
	TraesCS4D02G292300.2				>TaHMA005	MATAPASPLLHVRAQIPSANPLLFARRLRLPRSRRSAAASQQRLRLIPRELSAGSPRAAADPSASTAVDVPPAAEEGASATVLLDVSGMMCGGCAARVRSILAADARVENAAVNLLAESAAVRLRSPAPGAGEELAERLTVCGFPSAARRGGAAAGAAESALKWREMAARKSELLTRSRGRVAFAWTLVALCCGSHASHLLHSLGIHIGHGTFLDVLHNSYVKCGIAVVALFGPGRDILFDGLRAFKQGSPNMNSLVGFGSAAAFAISAVSLLNPELAWNSTFFDEPVMLLGFVLLGRSLEESARLKASSDMNELISLLSPQSRLVVTSSSEDLPSDGILNSDAITVEVPVDDVRVGDSVLVLPGETIPVDGNVTGGSSFVDESMLTGESLPVAKEKGC…
	TraesCS5A02G383400.1				>TaHMA006	MMGGGESYPALEASLLAEEAAARRQWEKTYLDVLGVCCSAEVALVERLLAPLDGVRAVAVVVPSRTVVVEHDPAAVSQSRIVKVLNGAGLEASVRAYGSSGFIGRRPSPYIVACGALLLASSFRWLLLPLQWLALGAACAGAPPMVLRGLAAASRLALDINILMLIAVAGAVALKDYTEAGVIVFLFTTAEWLETLACTKASAGMSSLMSMIPPKAVLAETGEVVNVRDIGVGVVIAVRAGEMVPVDGVVVDGQSEVDERSLTGESYPVPKQPQSEVWAGTLNLDGYIAVRTMALAENSTVAKMERLVEEAQQSKSKTQRLIDSCAKYYTPAVVVLGAGVALLPPLLGARDAERWFRLALVLLVSACPCALVLSTPVATFCALLTAARMGVLVKGGDVL…
	TraesCS5B02G388000.1				>TaHMA007	MMGGGESYAALEESLLPEQAAARRQWEKTYLDVLGVCCSAEVALVERLLAPLDGVRAVSVVVPSRTVVVEHDPAAVSQSRIVKVLNGAGLEASVRAYGSSGVIGRWPSPYIVACGVLLLASSFRWLLPPLQWLALAAACAGAPPMLLRGIAAASRLTLDINILMLIAVAGAVALKDYTEAGVIVFLFTTAEWLETLACTKASAGMSSLMSMIPPKAVLAETGEVVNVRDIGVGAVIAVRAGEMVPVDGMVVDGQSEVDERSLTGESYPVPKQPHSEVWAGTLNLDGYIAVRTMALAENSTVAKMERLVEEAQQSKSRTQRLIDSCAKYYTPAVVVLGAGVALLPPLLGARDAERWFRLALVLLVSACPCALVLSTPVATFCALLTAARMGVLVKGGDVL…
	TraesCS5D02G392700.1				>TaHMA008	MMGGGEPYTALEESLLSGEAAARRQWEKTYLDVLGVCCSAEVALVERLLAPLDGVRAVSVVVPSRTVVVEHDPAAVSQSRIVKVLNGAGLEASVRAYGSSGVIGRWPSPYIVACGALLLASSFRWLLPPLQWLALGAACAGAPPMLLRGLAAASRLTLDINILMLIAVAGAVALKDYAEAGVIVFLFTTAEWLETLACTKASAGMSSLMSMIPPKAVLAETGEVVNVRDIGVGAVIAVRAGEMVPVDGVVVDGQSEVDERSLTGESYPVPKQPQSEVWAGTLNLDGYIAVRTMALAENSTVAKMERLVEEAQQSKSKTQRLIDSCARYYTPAVVVLGAGVALLPPLLGARDAERWFRLALVLLVSACPCALVLSTPVATFCALLTAARMGVLVKGGDVL…
	TraesCS6A02G156900.1				>TaHMA009	MAHLQLTAVAGGSDDDMEEVALLGSYGEAEGPSSRTEEEEEAGMRRAQVRVTGMTCSACTGAVEAALSARCGVSSAAVSLLQNRAHVVFDPALAKEEDIVEAIEDAGFEAEILPDSAVSQPKSQKVLSGQFRIGGMTCAACVNSVEGILKKLPGVNRAVVALATSLGEVEYDPTAISKDEIVQAIEDAGFEAALVQSSEQDKALLGLIGLHTERDVNLLYDILRKTEGLRQFDVNSVRAEVEITFDPEVVGLRSVVDIIDMESSGRLKGHVQNPYVRSSSNDAQEASKMLHLLRSSLFLSIPVFFMRMVCPHISFINSFLLMHCGPFRIGDLLKWMLVSVVQFVVGKRFYIAAYRALRHGSTNMDVLVVLGTTATYVYSVCALLYGAFTGFHPPMYFET…
	TraesCS6A02G158900.1				>TaHMA010	MEQNGESHLKEPLLHAADGASAAAARVSPRKERTTRKVMFNVRGMSCGSWVVAGLKGVESIQVSTLQGQAVVQYSPEETDARTIKEAIEDINFEVDELQEQEIAVCRLRIKGMACTSCSESIERALLMVPGVKKAAVGLALEEAKVHFDPNITSRDLLIEAIEDAGFGADLISYGDDVNKMHLKLEGVSSPEDTKLIQSVLETVEGVNNVEWDTSGQTVTVAYDPDVTGPRLLIQRIQDAAEPPKCFNASLYSPPKQREVERHHEIMSYRNQFLWSCLFSVPVFLFAMVLPMLPPSGDWLFYKIYNNMTVGMLLRWLLCSPVQFIIGWRFYVGAYHALKRGYSNMDVLVALGTNAAYFYSVYIIVKALTSDTFEGQDLFETSSMLVSFILLGKYLEVVA…
	TraesCS6B02G184800.1				>TaHMA011	MAHLQLTAVAGGRDDDMEEVALLGSYGEAEGPSSRKGEEEEEEAGMRRAQVRVTGMTCSACTGAVEAALSARRGVRSAAVSLLQNRAHVVFDPALAKEEDIVEAIEDAGFEAEILPDSAVSQPKSQKALSGQFRIGGMTCAACVNSVEGILKKLPGVNRAVVALATSLGEVEYDPTAISKDDIVQAIEDAGFEAALVQSSEQDKALLGLIGLHTERDVNLLYDILRKTEGLRQFDVNSVRAEVEITFDPEVVGLRSVVDIIEMESSGRLKAHVQNPYVRSSSNDAQEASKMLHLLRSSLFLSIPVFFMRMVCPHISFINSILLMHCGPFRIGDLLKWMLVSVVQFVVGKRFYIAAYRALRHGSTNMDVLVVLGTTATYVYSVCALLYGAFTGFHPPMYF…
	TraesCS6B02G192400.1				>TaHMA012	MERNGESHLKEPLLHAADGASPASARVSPRKERTTRKVMFNVRGMSCGSCAVSIETVVAGLKGVESIQVSTLQGQAVVQYSPEETDARTIKEAIEDINFEVDELQEQEIAVCRLRIKGMACTSCSESIERALLMVPGVKKAAVGLALEEAKVHFDPNITSRDLLIEAIEDAGFGADLISYGDDVNKMHLKLEGVSSPEDTKLIQSVLETVEGVNNVEWDTSGQTVTVAYDPDVTGPRLLIQRIQDAAEPPKCFNASLYSPPKQREVERHHEIMSYRNQFLWSCLFSVPVFLFAMVLPMLPPSGDWLFYKIYNNMTVGMLLRWLLCSPVQFIIGWRFYVGAYHALKRGYSNMDVLVALGTNAAYFYSVYIIVKALTSDTFEGQDLFETSSMLVSFILLGK…
	TraesCS6D02G146500.1				>TaHMA013	MAHLQLTAVAGGRDDEMEEVALLGSYGEAEGPSSRKGQEEEEAGMRRAQVRVTGMTCSACTGAVEAALSARRGVRSAAVSLLQNRAHVVFDPALAKEEDIVEAIEDAGFEAEILPDSAVSQPKSQKALSGQFRIGGMTCAACVNSVEGILKKLPGVNRAVVALATSLGEVEYDPTAISKDEIVQAIEDAGFEAALVQSSEQDKALLGLIGLHTERDVNLLYDILRKTEGLRQFDVNSVRAEVEITFDPEVVGLRSVVDIIDMESSGRLKAHVQNPYVRSSSNDAQEASKMLHLLRSSLFLSIQVFFMRMVCPHISFINSFLLMHCGPFRIGDLLKWMLVSVVQFVVGKRFYVAAYRALRHGSTNMDVLVVLGTTATYVYSVCALLYGAFTGFHPPMYFE…
	TraesCS6D02G153600.1				>TaHMA014	MLCYFHDVVLTNSATGMEQNGESHLKEPLLHAADGASAAAARVSPRKERTTRKVMFNVRGMSCGSCAVSIETVVAGLKGVESIQVSTLQGQAVVQYSPEETDARTIKEAIEDINFEVDELQEQEIAVCRLRIKGMACTSCSESIERALLMVPGVKKAAVGLALEEAKVHFDPNITSRDLLIEAIEDAGFGADLISYGDDVNKMHLKLEGVSSPEDTKLIQSVLETVEGVNNVEWDTSGQTVTVAYDPYVTGPRLLIQRIQDAAEPPKCFNASLYSPPKQREVERHHEIMSYRNQFLWSCLFSVPVFLFAMVLPMLPPSGDWLFYKIYNNMTVGMLLRWLLCSPVQFIIGWRFYVGAYHALKRGYSNMDVLVALGTNAAYFYSVYIIVKALTSDTFEGQD…
	TraesCS7A02G239700.1				>TaHMA015	MSCGGCAASVKRILENEPQVVSATVNLATEMAVVWAVPEDRAVQDWKLQLGEKLASQLTTCGYKSSQRDSSKVSSQNVFERKMGEKLQNLKQSGRELAVSWALCAVCLLGHISHLFGVNAPLVHLFHSTGFHLSLSIFTFIGPGRRLIIDGIKSLFKGSPNMNTLVGLGALSSFAVSSVAAFIPKLGWKTFFEEPIMLIAFVLLGKNLEQRAKLKAASDMTGLLNILPSKARLMVDNDAEQSSFTEVPCGTLAVGDYMLVLPGDRIPADGLVKAGRSTVDESSLTGEPMPVTKIAGAEVSAGSINLNGKLTVEVRRPGGETVMSDILHLVEEAQTREAPVQRLADKVAGNFTYGVMALSSATFMFWSIFGSQFVPAAIQQGSAMSLALQLSCSVLVIAC…
	TraesCS7A02G419500.1				>TaHMA016	MGDSAAPAPAAGRLEKSYFDVLGICCPSEVPLVEKLLEPLAGVHKVTVVVPSRTVIVLHDAAAISTAQIVRELNGVRLEASVRAYGGAGQSKVSNKWPSPYVLVCGVLLVVSLFEHFWRPLKWFAVAGAAAGLPPIVLRSVAALRRRTMDVNILMLIAVAGAIALKDYSEAGFIVFLFTIAEWLETRACGKATAGMSSLMSMAPQNAVLAETGQVVATQDVKINTVIAVKAGEVVPIDGVVVDGRSEVDESTLTGESFPVSKQADSQVWAGTLNIDGYIAMRTTAMADNSAVAKMARLVEEAQNSRSSTQRLIDTCAKYYTPAVIFMSAAVAVIPVCVRARNLRHWFELALVLLVSACPCALVLSTPVATFCALLRAARTGLLIKGGDVLESLASIKVA…
	TraesCS7A02G420000.1				>TaHMA017	MAGRQEKSYFDVLGICCPSEVPLVEKLLEPLAGVHKVTVVVPSRTVIVVHDAAAISQAQIVKALNQARLEASVRAYGGAGQNKINKWPSPYVLVCGVLLVVSLFEHFWRPLRWLALVATAAGLPPIVLRSVAAARRLTLDVNILMLIAVAGAIALKDYSEAGFIVFLFTTAEWLETRASCKATAGMASLMSMAPQNAVLAETGQVVAAQDVKVNTVIAVKAGEVVPIDGVVVDGRSEVDEQTLTGESFPVAKQTDSEVWAGTLNIDGYISVRTTAMADNSAVAKMARLVEEAQNSRSETQRLIDTCAKYYTPAVIVMAAAVAVTPVIVRARNLRHWFQLALVLLVSACPCALVLSTPVATFCALLKAARTGLLIKGGDVLESLAGIKVAAFDKTGTITS…
	TraesCS7A02G439100.1				>TaHMA018	MQFLTASAACSSSAPRPAHLLRVSRPPPFPHLRRRRAPYLPSASLCLAARPPLLLASRRSLLFTPRAHGDHHHHHHNHHGHGHGHGHGHHGHDHGHGGADVHGGGGGAAVMRMARAIGWADVADALREHLQLCCISLGLLLMAAVCPHVPLLNSVGRLPAALIAVAFPLVGVSAALDALVDIADGKINIHVLMALAAFASIFMGNSLEGGLLLAMFNLAHIAEEYFTSKSMYDVRELKENHPEFALLLETSGDESAHFSNLNYAKVPVHDLEVGSHILVRAGEAVPVDGEVYQGSSTITIEHLTGETKPVERTVGDAIPGGARNLEGMMIVKVTKSWEDSTLNRIVQLTEEGQLNKPKLQRWLDEFGEHYSKVVVALSLAVALLGPFLFNWPFFGNSVC…
	TraesCS7A02G480100.1				>TaHMA019	MAHLQLAAVAGGGRAGDDMEEVALLGSYDEEMGGAAPAGGGAEEDEEEAEAHVRVTGMTCSACTGAVEAAVSARRGVRRVAVSLLQNRARVVFDPALVKVEDIIEAIEDAGFDAEILPDSAVPQPKSQKTLSAQFRIGGMTCANCVNSVEGILRKQPGIKGAVVALATSLGEVEYDPSTISKDEIVQAIEDAGFEAAFLQSSEQDKILLGLTGVHTERDADVLHDILKKMDGLRQFAVNTTLSEVEIVFDPEAVGLRSIVDTIEMGSNGRFKSHVQNPYSRGASNDAHEASKMLHLLRSSLFLSIPVFFIRMICPSIPFISTLLLRHCGPFHMGDLVNWILVSIVQFVIGKRFYVAAYRALRHGSTNMDVLVVLGTTASYVYSVCALLYGAFTGFQPPI…
	TraesCS7B02G135300.1				>TaHMA020	MDPATPLLAISRAISSRSRSFPASSPHNILLRGRPLTAPLGRAPVFAASAQRRFAVNGDVLLLSLARLALRGPAAPRAGPRRWFASVSASPLASTGPPGGGCGRGNGDEGGGDDGGGDGWKRPRASQGTAVAEEASGLEADTIILDVGGMSCGGCAASVKRILENESQVVSATVNLATEMAVVWAVPEDRAVQDWKLQLGEKLASQLTTCGYKSSQRDSSKVSSQNVFERKMGEKLQNLKQSGRELAVSWALCAVCLLGHISHLFGVNAPLMHMFHSTGFHLSLSIFTFIGPGRRLIVDGLKSLFKGSPNMNTLVGLGALSSFAVSSVAAFIPKLGWKTFFEEPIMLIAFVLLGKNLEQRAKLKAASDMTGLLNILPSKARLMVGNDAEQSSFTEVPCG…
	TraesCS7B02G320100.2				>TaHMA021	MGDSAAPAGKLEKSYFDVLGICCPSEVPLVEKLLEPLAGVHKVTVVVPSRTVIVLHDAAAISTAQIVRALNGARLEASVRAYGGAGQSKVSNKWPSPYVLVCGVLLVVSLFEHFWRPLKWFAVAGAAAGLPPIVLRSVAALRRRTMDVNILMLIAVAGAIALKDYSEAGFIVFLFTIAEWLETRACGKATAGMSSLMSMAPQNAVLAETGQVVATQDVKINTVIAVKAGEVVPIDGVVVDGRSEVDESTLTGESFPVSKQTDSQVWAGTLNIDGYISVRTTAMADNSAVAKMARLVEEAQNSRSSTQRLIDTCAKYYTPAVIFMSAAVAVIPVCVKARNLRHWFELALVLLVSACPCALVLSTPVATFCALLRAARTGLLIKGGDVLESLASIKVAAFD…
	TraesCS7B02G320900.1				>TaHMA022	MAGRQEKSYFDVLGICCPSEVPLVEKLLEPLPGVHKVTVIVPSRTVIVVHDAATISQAQIVKALNGARLEASVRAYGGGADKINKWPSPYVLLCGVLLVASLFQHFWHPLRWLALVATAAGLPPIVLRSVAAARRLTLDVNILMLIAVGGAVALKDYSEAGFIVFLFTTAEWLETRASCKATAGMSSLMSMAPQNAVLAETGQVVVAQDVKVDTVIAVKAGEVVPIDGVVVDGRSEVDEQTLTGESFLVAKQTDSQVWAGTLNIDGYISVRTTAMADNSAVAKMARLVEEAQNSRSETQRLIDTCAKYYTPAVIVMAAAVAVTPVIVRAHNLRHWFQLALVLLVSACPCAVVLSTPVATFCALLKAARTGLLIKGGDVLESLAGIKVAAFDKTGTITSG…
	TraesCS7B02G382300.1				>TaHMA023	MPLQSVLLQGILLKGGHVLDALSSCQSIAFDKTGTLTTGKLMCKAIEPIHGHLDASNGVDPSCCTPNCESEALAVAAAMEKGTTHPIGRAVLKHSVGRDLPVVAVESFESLPGRGVVATLSGIKARDSENEFAKASIGSVEYISSLYRSYGESEQIKEAVKCSAFGPEFVQAALSVDKKVTLFHFEDEPRTGVCEVIYTLREKAKLRIMMLTGDHESSAQRVAKAVCIEEVHFSLKPEDKLNKVKAVSREGGGGLIMVGDGINDAPALAAATVGIVLAQRASATAVAVADVLLLQDNLCVVPFCIAKARQTTSLVKQSVALALTCIVFAALPSVLGFLPLWLTVLLHEGGTLLVCLNSIRALNPPTWSWADDIRQLVHSLKNYVSAKLNSSSSDCSAST…
	TraesCS7D02G237500.1				>TaHMA024	MAHLQLAAVAGGGRAGDDMEDVALLGSYDEEMGGAAPAGGGAEDAEEEAEAHVRVTGMTCSACTGAVEAAVSARRGVRRVAVSLLQNRARVVFDPALLKVEDIIEAIEDAGFDAEILPDSAVPQPKSQKTLSAQFRIGGMTCANCVNSVEGILKKQPGIKGAVVALATSLGEVEYDPSTISKDEIVQAIEDAGFEAAFLQSSEQDKILLGLTGTHTERDADILHDILKKMDGLRQFAVNTTLSEVEIVFDPEAVGLRSIVDTIETGSNGRFKAHVQNPYSRGASNDAHEASKMLHLLRSSLFLSIPVFFIRMICPSIPFISTLLLRHCGPFHMGDLVNWILVSIVQFVVGKRFYVAAYRALRHGSTNMDVLVVLGTTASYVYSVCALLYGAFTGFQPPI…
	TraesCS7D02G412400.1				>TaHMA025	MDPATPLLAISRAISSRSRSFPASSPHNILLRGRPLTAPLGRAPVFAASAQRRFAVNGDVLLLSLARLALRGPASPRAGPRRWFASVSVSPLASAGPPGGGCGRGNGDGGGGGDGGGDGWKRPRASQGMAVAEEAAGLEADTIILDVGGMSCGGCAASVKRILENESQVVSATVNLATEMAVVWAVPEDRAVQDWKLQLGEKLASQLTTCGYKSSQRDSSKVSSQNVFERKMGEKLQNLKQSGRELAVSWALCAVCLLGHISHLFGVNAPLMHMFHSTGFHLSLSIFTFIGPGRRLIVDGLKSLFKGSPNMNTLVGLGALSSFAVSSVAAFIPKLGWKTFFEEPIMLIAFVLLGKNLEQRAKLKAASDMTGLLNILPSKARLMVDNDAEQSSFTEVPCG…
	TraesCS7D02G412800.1				>TaHMA026	MADSTSPAAAARLEKSYFDVLGICCPSEVPLVEKLLEPLAGVHKVTVVVPSRTVIVLHDAAAISQAQIVRALNGARLEASVRAYGGAGQSKVSNKWPSPYVLVCGVLLVVSLFEHFWRPLRWFAVAGAAAGLPPIVLRSVAALRRRTMDVNILMLIAVAGAIALKDYPEAGFIVFLFTIAEWLETRACGKATAGMSSLMSMAPQNAVLAETGQVVATQDVKINTVIAVKAGEVVPIDGVVVDGRSEVDESTLTGESFPVSKQADSQVWAGTLNIDGYIAVRTTAMADNSAVAKMARLVEEAQNSRSSTQRLIDTCAKYYTPAVIFMSAAVAVIPVCVKARNLRHWFELALVLLVSACPCALVLSTPVATFCALLRAARTGLLIKGGDVLESLASIKVAA…
	TraesCS7D02G428700.1				>TaHMA027	MAAGKQEKSYFDVLGICCPSEVPLVEKLLEPLAGVHKVTVVVPSRTVIVVHDAATISQSQIVKALNQARLEASVRAYGGAGQNKINKWPSPYVLLCGVLLVASLFQHFWHPLRWLALVATAAGLPPIVLRSVAAARRLTLDVNILMLIAVGGAVALKDYSEAGFIVFLFTTAEWLETRASCKATAGMSSLMSMAPQNAVLAETGQVVAAQDVKVNTVIAVKAGEVVPIDGVVVDGRSEVDEQTLTGESFPVAKQTDSEVWAGTLNIDGYISVRTTAMADNSAVAKMARLVEEAQNSRSETQRLIDTCAKYYTPAVIVMAAAVAATPVIVRAHNLRHWFQLALVLLVSACPCALVLSTPVATFCALLKAARTGLLIKGGDVLESLAGIKVAAFDKTGTIS…
	TraesCS7D02G467100.1				>TaHMA028	MQFLTASAACSSSAPRPAHLLRVSRPPPFPQPRRRRAPHLPSAALSLAPRPPLLLASRRSLLFTPRAHGDHHHHHGHTHHGHGHSHGHHGHGHGHGGADVRGGGGGAAVMRMARAIGWADVADALREHLQLCCISLALLLMAAVCPHVPLLNSVGRLPAALIAVAFPLVGVSAALDALVDIADGKINIHVLMALAAFASIFMGNSLEGGLLLAMFNLAHIAEEYFTSKSMYDVRELKENHPEFALLLETSGDESAHFSNLNYAKVPVHDLEVGSHILVRAGEAVPVDGEVYQGSSTITIEHLTGETKPVERTVGDAIPGGARNLEGMMIVKVTKSWEDSTLNRIVQLTEEGQLNKPKLQRWLDEFGEHYSKVVVALSLAVALLGPFLFNWPFFGNSVCR…
					>TaHMA029	MAHLQLAAVAGGGRAGDDMEDVALLGSYDEEMGGAAPAGGGRGGAEEDAEAHVRVTGMTCSACTGAVEAAVSARRGVRRVAVSLLQNRARVVFDPALVKVEDIIEAIEDAGFDAEILPDSAVPQPKSQKTLSAQFRIGGMTCANCVNSVEGILKKQPGIKGAVVALATSLGEVEYDPSTISKDEIVQAIEDAGFEAAFLQSSEQDKILLGLTGIHTERDADILHDILKKMNGLREFAVNTTLSEVEIVFDPEAVGLRSIVDTIEMGSNGRFKAHVQNPYSRGASNDAHEASKMLHLLCSSLFLSIPVFFIRMICPSIPFISTLLLRHCGPFHMGDLVNWILVSIVQFVIGKRFYIAAYRALRHGSTNMDVLVVLGTTASYVYSVCALLYGAFTGFQPPI…
