# Supplementary material for: Genome-wide survey of the HMA gene family in wheat (Triticum aestivum) and its potential role in cadmium stress
Source: Research Square preprint supplement (doi:10.21203/rs.3.rs-5264727/v1), 2025-04-11
Supplement: Supplementary file 4 [file 9c7d706273f9e52b0f292b4d.xlsx]

## Sheet: Sheet1
Table S4. Ka/Ks ratios and estimated divergence time for orthologous TaHMA genes between wheat and rice
Location on wheat genome				Location on rice genome				Ka	Ks	Ka/Ks	Mya
Gene Name	Chr.	Start	End	Gene ID	Chr.	Start	End
Os02t0196600	2	5404703	5410606	TaHMA010	6A	150964243	150970363	0.0610267	0.523947	0.116475	40.3036
Os02t0172600	2	3949357	3957073	TaHMA009	6A	146000586	146005878	0.0657678	0.525621	0.125124	40.4324
Os02t0196600	2	5404703	5410606	TaHMA012	6B	226399885	226404875	0.0594125	0.505226	0.117596	38.8636
Os02t0172600	2	3949357	3957073	TaHMA011	6B	207923884	207929181	0.0651726	0.502526	0.12969	38.6559
Os02t0196600	2	5404703	5410606	TaHMA014	6D	127382802	127388058	0.0609032	0.519889	0.117147	39.9915
Os02t0172600	2	3949357	3957073	TaHMA019	7A	672069735	672075854	0.0793664	0.911225	0.0870986	70.0942
Os02t0172600	2	3949357	3957073	TaHMA023	7B	648103932	648109965	0.0808688	0.882903	0.0915942	67.9156
Os03t0178100	3	4119053	4128253	TaHMA004	4A	6020338	6033023	0.079312	0.555894	0.142675	42.7611
Os03t0178100	3	4119053	4128253	TaHMA005	4D	463402923	463409941	0.079345	0.558294	0.14212	42.9457
Os04t0556000	4	27828703	27836671	TaHMA001	2A	668067544	668073388	0.0618487	0.578385	0.106933	44.4912
Os04t0556000	4	27828703	27836671	TaHMA002	2B	616494297	616500111	0.0597087	0.575342	0.10378	44.2571
Os04t0556000	4	27828703	27836671	TaHMA003	2D	522990194	523000156	0.063765	0.53945	0.118204	41.4962
Os06t0665800	6	27515799	27524905	TaHMA011	6B	207923884	207929181	0.0918734	0.776332	0.118343	59.7179
Os06t0665800	6	27515799	27524905	TaHMA013	6D	117414359	117419743	0.0893019	0.80555	0.110858	61.9654
Os06t0665800	6	27515799	27524905	TaHMA019	7A	672069735	672075854	0.0575234	0.525168	0.109533	40.3976
Os06t0690700	6	28787334	28799247	TaHMA018	7A	634378971	634387635	0.0610442	0.427773	0.142702	32.9056
Os06t0700700	6	29472175	29482360	TaHMA016	7A	611316717	611334498	0.137884	0.701773	0.19648	53.9825
Os06t0665800	6	27515799	27524905	TaHMA023	7B	648103932	648109965	0.0548834	0.484322	0.11332	37.2556
Os06t0700700	6	29472175	29482360	TaHMA021	7B	570450770	570459961	0.144153	0.701964	0.205356	53.9972
Os06t0665800	6	27515799	27524905	TaHMA028	7D	580570228	580576400	0.0567836	0.513797	0.110517	39.5229
Os06t0690700	6	28787334	28799247	TaHMA027	7D	548885379	548894155	0.0653854	0.404233	0.161752	31.0948
Os06t0700700	6	29472175	29482360	TaHMA025	7D	530907556	530915075	0.135772	0.710464	0.191103	54.651
