# Supplementary material for: Genome-wide survey of the HMA gene family in wheat (Triticum aestivum) and its potential role in cadmium stress
Source: Research Square preprint supplement (doi:10.21203/rs.3.rs-5264727/v1), 2025-04-11
Supplement: Supplementary file 5 [file a07c44a2903a65e30bc9d3d6.xlsx]

## Sheet: Sheet1
Table S5. Ka/Ks ratios and estimated divergence time for orthologous TaHMA genes between wheat and A. tauschii
Location on wheat genome				Location on A. tauschii genome				Ka	Ks	Ka/Ks	Mya
Gene Name	Chr.	Start	End	Gene ID	Chr.	Start	End
AET2Gv20910400	2D	521713977	521727798	TaHMA001	2A	668067544	668073388	0.0193978	0.101032	0.191996	7.77171
AET2Gv20910400	2D	521713977	521727798	TaHMA002	2B	616494297	616500111	0.0189848	0.100408	0.189077	7.72367
AET2Gv20910400	2D	521713977	521727798	TaHMA003	2D	522990194	523000156	0.00176575	0.00136737	1.29135	0.105182
AET4Gv20711400	4D	469789550	469799476	TaHMA004	4A	6020338	6033023	0.0146899	0.107256	0.136962	8.25045
AET4Gv20711400	4D	469789550	469799476	TaHMA005	4D	463402923	463409941	0	0.00429493	0	0.330379
AET5Gv20895000	5D	469969568	469974152	TaHMA006	5A	581137113	581140512	0.0239874	0.078881	0.304096	6.06777
AET5Gv20895000	5D	469969568	469974152	TaHMA007	5B	567018067	567021814	0.0250592	0.109958	0.227898	8.45828
AET6Gv20415800	6D	151545676	151554399	TaHMA010	6A	150964243	150970363	0.00135952	0.035892	0.037878	2.76092
AET6Gv20398800	6D	141457048	141464813	TaHMA011	6B	207923884	207929181	0.00501903	0.0735162	0.0682711	5.65509
AET6Gv20415800	6D	151545676	151554399	TaHMA012	6B	226399885	226404875	0.0036112	0.0790976	0.045655	6.08443
AET6Gv20415800	6D	151545676	151554399	TaHMA014	6D	127382802	127388058	0.000899415	0.00138825	0.647879	0.106788
AET6Gv20398800	6D	141457048	141464813	TaHMA019	7A	672069735	672075854	0.0936577	0.812121	0.115325	62.4709
AET6Gv20398800	6D	141457048	141464813	TaHMA023	7B	648103932	648109965	0.0939353	0.808952	0.11612	62.2271
AET6Gv20398800	6D	141457048	141464813	TaHMA028	7D	580570228	580576400	0.0969279	0.802448	0.12079	61.7267
AET7Gv21175500	7D	585368773	585377585	TaHMA011	6B	207923884	207929181	0.0980545	0.777849	0.126059	59.8345
AET7Gv21175500	7D	585368773	585377585	TaHMA013	6D	117414359	117419743	0.0976709	0.813121	0.120118	62.5478
AET7Gv21017000	7D	532078552	532089433	TaHMA016	7A	611316717	611334498	0.0109381	0.100598	0.108731	7.73829
AET7Gv21057700	7D	550198976	550211206	TaHMA018	7A	634378971	634387635	0.00649912	0.065634	0.0990206	5.04877
AET7Gv21175500	7D	585368773	585377585	TaHMA019	7A	672069735	672075854	0.0102254	0.0875335	0.116817	6.73335
AET7Gv20587600	7D	203626152	203639486	TaHMA015	7A	214311509	214322302	0.00881391	0.0535942	0.164456	4.12263
AET7Gv21017000	7D	532078552	532089433	TaHMA021	7B	570450770	570459961	0.016397	0.106834	0.153482	8.21798
AET7Gv21175500	7D	585368773	585377585	TaHMA023	7B	648103932	648109965	0.0077695	0.108276	0.0717563	8.32894
AET7Gv20587600	7D	203626152	203639486	TaHMA020	7B	165301384	165310703	0.00844188	0.0450662	0.187322	3.46663
AET7Gv20587600	7D	203626152	203639486	TaHMA024	7D	201883715	201893169	0.00233609	0.00282486	0.826974	0.217297
AET7Gv21017000	7D	532078552	532089433	TaHMA025	7D	530907556	530915075	0.00087165	0.00562986	0.154826	0.433067
AET7Gv21175500	7D	585368773	585377585	TaHMA028	7D	580570228	580576400	0	0.00407333	0	0.313333
