# Supplementary material for: Genome-wide survey of the HMA gene family in wheat (Triticum aestivum) and its potential role in cadmium stress
Source: Research Square preprint supplement (doi:10.21203/rs.3.rs-5264727/v1), 2025-04-11
Supplement: Supplementary file 6 [file ad8d1590692f68be480e9fc0.xlsx]

## Sheet: Sheet1
Table S6. Ka/Ks ratios and estimated divergence time for orthologous TaHMA genes between wheat and B. distachyon
Location on wheat genome				Location on B. distachyon genome				Ka	Ks	Ka/Ks	Mya
Gene Name	Chr.	Start	End	Gene ID	Chr.	Start	End
KQK23343	Chromosome 1	70683435	70691245	TaHMA004	4A	6020338	6033023	0.826515	3.02768	0.272986	232.899
KQK23343	Chromosome 1	70683435	70691245	TaHMA005	4D	463402923	463409941	0.817188	4.63315	0.176379	356.396
KQK17019	Chromosome 1	70683435	70691245	TaHMA009	6A	146000586	146005878	0.0998719	0.831512	0.120109	63.9625
KQK17019	Chromosome 1	70683435	70691245	TaHMA011	6B	207923884	207929181	0.10074	0.779658	0.129211	59.9737
KQK17019	Chromosome 1	70683435	70691245	TaHMA013	6D	117414359	117419743	0.0985544	0.81347	0.121153	62.5746
KQK17019	Chromosome 1	70683435	70691245	TaHMA019	7A	672069735	672075854	0.0336526	0.342685	0.0982028	26.3604
KQK17390	Chromosome 1	29827924	29835867	TaHMA016	7A	611316717	611334498	0.0858112	0.377211	0.227488	29.0163
KQK17265	Chromosome 1	29001763	29010619	TaHMA018	7A	634378971	634387635	0.0487047	0.243989	0.199619	18.7684
KQK17390	Chromosome 1	29826336	29837455	TaHMA021	7B	570450770	570459961	0.0861038	0.397033	0.216868	30.541
KQK17019	Chromosome 1	27475044	27484382	TaHMA023	7B	648103932	648109965	0.0325071	0.343413	0.0946588	26.4164
KQK17019	Chromosome 1	27475044	27484382	TaHMA028	7D	580570228	580576400	0.034585	0.34025	0.101646	26.1731
KQK17390	Chromosome 1	29827924	29835867	TaHMA025	7D	530907556	530915075	0.0856329	0.4045	0.211701	31.1154
KQK17265	Chromosome 1	29001763	29010619	TaHMA027	7D	548885379	548894155	0.0502213	0.229852	0.218494	17.6809
KQJ93861	Chromosome 3	5285269	5293830	TaHMA010	6A	150964243	150970363	0.0402547	0.335663	0.119926	25.8202
KQJ93558	Chromosome 3	3753242	3760790	TaHMA009	6A	146000586	146005878	0.0393508	0.317346	0.124	24.4112
KQJ93861	Chromosome 3	5285269	5293830	TaHMA012	6B	226399885	226404875	0.0377385	0.328754	0.114793	25.2888
KQJ93558	Chromosome 3	3753242	3760790	TaHMA011	6B	207923884	207929181	0.0392639	0.285472	0.13754	21.9594
KQJ93861	Chromosome 3	5285269	5293830	TaHMA014	6D	127382802	127388058	0.0396302	0.323318	0.122574	24.8706
KQJ93558	Chromosome 3	3753242	3760790	TaHMA019	7A	672069735	672075854	0.0820146	0.743316	0.110336	57.1782
KQJ93558	Chromosome 3	3753242	3760790	TaHMA023	7B	648103932	648109965	0.0835187	0.7283	0.114676	56.023
KQJ93558	Chromosome 3	3753242	3760790	TaHMA028	7D	580570228	580576400	0.0852225	0.754065	0.113017	58.005
KQJ83984	Chromosome 5	21256691	21265729	TaHMA001	2A	668067544	668073388	0.0468613	0.482633	0.0970952	37.1256
KQJ83984	Chromosome 5	21256691	21265729	TaHMA002	2B	616494297	616500111	0.0486485	0.474106	0.102611	36.4697
KQJ83984	Chromosome 5	21256691	21265729	TaHMA003	2D	522990194	523000156	0.0448712	0.456399	0.0983157	35.1076
