# Supplementary material for: Genome-wide survey of the HMA gene family in wheat (Triticum aestivum) and its potential role in cadmium stress
Source: Research Square preprint supplement (doi:10.21203/rs.3.rs-5264727/v1), 2025-04-11
Supplement: Supplementary file 7 [file c9a637624e8bf7d8b60f44ef.xlsx]

## Sheet: Sheet1
Table S8. The protein-protein interaction between TaHMAs and other proteins in wheat
TaHMA	other proteins in wheat
TaHMA010	TraesCS2A02G114900
TaHMA012	TraesCS2A02G114900
TaHMA014	TraesCS2A02G114900
TaHMA016	TraesCS2A02G114900
TaHMA017	TraesCS2A02G114900
TaHMA021	TraesCS2A02G114900
TaHMA022	TraesCS2A02G114900
TaHMA025	TraesCS2A02G114900
TaHMA026	TraesCS2A02G114900
TaHMA010	TraesCS2B02G134100
TaHMA012	TraesCS2B02G134100
TaHMA014	TraesCS2B02G134100
TaHMA016	TraesCS2B02G134100
TaHMA017	TraesCS2B02G134100
TaHMA021	TraesCS2B02G134100
TaHMA022	TraesCS2B02G134100
TaHMA025	TraesCS2B02G134100
TaHMA026	TraesCS2B02G134100
TaHMA015	TraesCS2D02G407800
TaHMA020	TraesCS2D02G407800
TaHMA024	TraesCS2D02G407800
TaHMA015	TraesCS2D02G495500LC
TaHMA020	TraesCS2D02G495500LC
TaHMA024	TraesCS2D02G495500LC
TaHMA009	TraesCS5A02G030100
TaHMA011	TraesCS5A02G030100
TaHMA013	TraesCS5A02G030100
TaHMA019	TraesCS5A02G030100
TaHMA023	TraesCS5A02G030100
TaHMA028	TraesCS5A02G030100
TaHMA015	TraesCS7A02G335400
TaHMA018	TraesCS7A02G335400
TaHMA020	TraesCS7A02G335400
TaHMA024	TraesCS7A02G335400
TaHMA027	TraesCS7A02G335400
TaHMA015	TraesCS7B02G247000
TaHMA018	TraesCS7B02G247000
TaHMA020	TraesCS7B02G247000
TaHMA024	TraesCS7B02G247000
TaHMA027	TraesCS7B02G247000
TaHMA015	TraesCS7D02G342900
TaHMA018	TraesCS7D02G342900
TaHMA020	TraesCS7D02G342900
TaHMA024	TraesCS7D02G342900
TaHMA027	TraesCS7D02G342900
TaHMA001	TraesCS2A02G399000
TaHMA002	TraesCS2A02G399000
TaHMA003	TraesCS2A02G399000
TaHMA004	TraesCS2A02G399000
TaHMA005	TraesCS2A02G399000
TaHMA007	TraesCS2A02G399000
TaHMA008	TraesCS2A02G399000
TaHMA009	TraesCS2A02G399000
TaHMA010	TraesCS2A02G399000
TaHMA011	TraesCS2A02G399000
TaHMA012	TraesCS2A02G399000
TaHMA013	TraesCS2A02G399000
TaHMA014	TraesCS2A02G399000
TaHMA015	TraesCS2A02G399000
TaHMA016	TraesCS2A02G399000
TaHMA017	TraesCS2A02G399000
TaHMA018	TraesCS2A02G399000
TaHMA019	TraesCS2A02G399000
TaHMA020	TraesCS2A02G399000
TaHMA021	TraesCS2A02G399000
TaHMA022	TraesCS2A02G399000
TaHMA023	TraesCS2A02G399000
TaHMA024	TraesCS2A02G399000
TaHMA025	TraesCS2A02G399000
TaHMA026	TraesCS2A02G399000
TaHMA027	TraesCS2A02G399000
TaHMA028	TraesCS2A02G399000
TaHMA001	TraesCS2B02G417000
TaHMA002	TraesCS2B02G417000
TaHMA003	TraesCS2B02G417000
TaHMA004	TraesCS2B02G417000
TaHMA005	TraesCS2B02G417000
TaHMA007	TraesCS2B02G417000
TaHMA008	TraesCS2B02G417000
TaHMA009	TraesCS2B02G417000
TaHMA010	TraesCS2B02G417000
TaHMA011	TraesCS2B02G417000
TaHMA012	TraesCS2B02G417000
TaHMA013	TraesCS2B02G417000
TaHMA014	TraesCS2B02G417000
TaHMA015	TraesCS2B02G417000
TaHMA016	TraesCS2B02G417000
TaHMA017	TraesCS2B02G417000
TaHMA018	TraesCS2B02G417000
TaHMA019	TraesCS2B02G417000
TaHMA020	TraesCS2B02G417000
TaHMA021	TraesCS2B02G417000
TaHMA022	TraesCS2B02G417000
TaHMA023	TraesCS2B02G417000
TaHMA024	TraesCS2B02G417000
TaHMA025	TraesCS2B02G417000
TaHMA026	TraesCS2B02G417000
TaHMA027	TraesCS2B02G417000
TaHMA028	TraesCS2B02G417000
TaHMA001	TraesCS2D02G396500
TaHMA002	TraesCS2D02G396500
TaHMA003	TraesCS2D02G396500
TaHMA004	TraesCS2D02G396500
TaHMA005	TraesCS2D02G396500
TaHMA007	TraesCS2D02G396500
TaHMA008	TraesCS2D02G396500
TaHMA009	TraesCS2D02G396500
TaHMA010	TraesCS2D02G396500
TaHMA011	TraesCS2D02G396500
TaHMA012	TraesCS2D02G396500
TaHMA013	TraesCS2D02G396500
TaHMA014	TraesCS2D02G396500
TaHMA015	TraesCS2D02G396500
TaHMA016	TraesCS2D02G396500
TaHMA017	TraesCS2D02G396500
TaHMA018	TraesCS2D02G396500
TaHMA019	TraesCS2D02G396500
TaHMA020	TraesCS2D02G396500
TaHMA021	TraesCS2D02G396500
TaHMA022	TraesCS2D02G396500
TaHMA023	TraesCS2D02G396500
TaHMA024	TraesCS2D02G396500
TaHMA025	TraesCS2D02G396500
TaHMA026	TraesCS2D02G396500
TaHMA027	TraesCS2D02G396500
TaHMA028	TraesCS2D02G396500
