# Supplementary material for: Genome-wide survey of the HMA gene family in wheat (Triticum aestivum) and its potential role in cadmium stress
Source: Research Square preprint supplement (doi:10.21203/rs.3.rs-5264727/v1), 2025-04-11
Supplement: Supplementary file 8 [file d86602e8eef178536e23ef3e.xlsx]

## Sheet: Sheet1
Table S7. GO annotations of TaHMA proteins
Gene Name	Cellular Component				Molecular Function								Biological Process
TaHMA001	GO:0016021				GO:0000166	GO:0005215	GO:0005507	GO:0005524	GO:0019829	GO:0046872	GO:0140603		GO:0006812	GO:0030001
TaHMA002	GO:0016021				GO:0000166	GO:0005215	GO:0005507	GO:0005524	GO:0019829	GO:0046872	GO:0140603		GO:0006812	GO:0030001
TaHMA003	GO:0016020	GO:0016021			GO:0000166	GO:0005215	GO:0005507	GO:0005524	GO:0019829	GO:0046872	GO:0140603		GO:0006812	GO:0030001	GO:0034220	GO:0098655
TaHMA004	GO:0016021				GO:0000166	GO:0005215	GO:0005524	GO:0019829	GO:0046872	GO:0140603			GO:0006812
TaHMA005	GO:0016021				GO:0000166	GO:0005215	GO:0005524	GO:0019829	GO:0046872	GO:0140603			GO:0006812
TaHMA006	GO:0016020	GO:0016021			GO:0000166	GO:0005215	GO:0005385	GO:0005524	GO:0015086	GO:0019829	GO:0046872	GO:0140603	GO:0006812	GO:0030001	GO:0034220	GO:0070574	GO:0071577	GO:0098655
TaHMA007	GO:0016020	GO:0016021			GO:0000166	GO:0005215	GO:0005385	GO:0005524	GO:0015086	GO:0019829	GO:0046872	GO:0140603	GO:0006812	GO:0030001	GO:0034220	GO:0070574	GO:0071577	GO:0098655
TaHMA008	GO:0016020	GO:0016021			GO:0000166	GO:0005215	GO:0005385	GO:0005524	GO:0015086	GO:0019829	GO:0046872	GO:0140603	GO:0006812	GO:0030001	GO:0034220	GO:0070574	GO:0071577	GO:0098655
TaHMA009	GO:0016021				GO:0000166	GO:0005215	GO:0005507	GO:0005524	GO:0019829	GO:0046872	GO:0140603		GO:0006812	GO:0030001
TaHMA010	GO:0016021				GO:0000166	GO:0005215	GO:0005507	GO:0005524	GO:0019829	GO:0046872	GO:0140603		GO:0006812
TaHMA011	GO:0016021				GO:0000166	GO:0005215	GO:0005507	GO:0005524	GO:0019829	GO:0046872	GO:0140603		GO:0006812
TaHMA012	GO:0016021				GO:0000166	GO:0005215	GO:0005507	GO:0005524	GO:0019829	GO:0046872	GO:0140603		GO:0006812	GO:0030001
TaHMA013	GO:0016021				GO:0000166	GO:0005215	GO:0005507	GO:0005524	GO:0019829	GO:0046872	GO:0140603		GO:0006812
TaHMA014	GO:0016021				GO:0000166	GO:0005215	GO:0005507	GO:0005524	GO:0019829	GO:0046872	GO:0140603		GO:0006812
TaHMA015	GO:0016021				GO:0000166	GO:0005215	GO:0005524	GO:0019829	GO:0046872	GO:0140603			GO:0006812
TaHMA016	GO:0016020	GO:0016021			GO:0000166	GO:0005215	GO:0005385	GO:0005524	GO:0015086	GO:0019829	GO:0046872	GO:0140603	GO:0006812	GO:0030001	GO:0034220	GO:0070574	GO:0071577	GO:0098655
TaHMA017	GO:0005886	GO:0009506	GO:0016020	GO:0016021	GO:0000166	GO:0005215	GO:0005524	GO:0019829	GO:0046872	GO:0140603			GO:0006812	GO:0006829	GO:0010043	GO:0015691	GO:0032025	GO:0034220	GO:0046686	GO:0055069	GO:0098655
TaHMA018	GO:0016021				GO:0000166	GO:0005215	GO:0005524	GO:0019829	GO:0140603				GO:0006812
TaHMA019	GO:0016021				GO:0000166	GO:0005215	GO:0005507	GO:0005524	GO:0019829	GO:0046872	GO:0140603		GO:0006812	GO:0030001
TaHMA020	GO:0009570	GO:0009941	GO:0016021		GO:0000166	GO:0005215	GO:0005385	GO:0005524	GO:0015086	GO:0019829	GO:0046872	GO:0140603	GO:0006812	GO:0009767	GO:0030001	GO:0055070
TaHMA021	GO:0005886	GO:0009506	GO:0016020	GO:0016021	GO:0000166	GO:0005215	GO:0005385	GO:0005524	GO:0015086	GO:0019829	GO:0046872	GO:0140603	GO:0006812	GO:0006829	GO:0010043	GO:0015691	GO:0030001	GO:0032025	GO:0034220	GO:0046686	GO:0055069	GO:0070574	GO:0071577	GO:0098655
TaHMA022	GO:0016020	GO:0016021			GO:0000166	GO:0005215	GO:0005524	GO:0019829	GO:0046872	GO:0140603			GO:0016020	GO:0016021
TaHMA023	GO:0016021				GO:0000166	GO:0005215	GO:0005507	GO:0005524	GO:0019829	GO:0046872	GO:0140603		GO:0006812	GO:0030001
TaHMA024	GO:0009570	GO:0009941	GO:0016021		GO:0000166	GO:0005215	GO:0005375	GO:0005524	GO:0016531	GO:0019829	GO:0046872	GO:0140603	GO:0006812	GO:0009767	GO:0055070
TaHMA025	GO:0005886	GO:0009506	GO:0016020	GO:0016021	GO:0000166	GO:0005215	GO:0005385	GO:0005524	GO:0015086	GO:0019829	GO:0046872	GO:0140603	GO:0006812	GO:0006829	GO:0010043	GO:0015691	GO:0032025	GO:0034220	GO:0046686	GO:0055069	GO:0070574	GO:0071577	GO:0098655
TaHMA026	GO:0016020	GO:0016021			GO:0000166	GO:0005215	GO:0005524	GO:0019829	GO:0046872	GO:0140603			GO:0006812	GO:0034220	GO:0098655
TaHMA027	GO:0016021				GO:0000166	GO:0005215	GO:0005524	GO:0019829	GO:0140603				GO:0006812
TaHMA028	GO:0016021				GO:0000166	GO:0005215	GO:0005507	GO:0005524	GO:0019829	GO:0046872	GO:0140603		GO:0006812	GO:0030001
